# Supplementary material
Source: ML conference proceedings conference paper supplement (https://openreview.net/forum?id=Ugy9DyhYYD)
Supplement: supplementary_material [file attachment]

# Collaborative Training of Tiny-Large Vision Language Models

Anonymous Authors

## 1 EXPERIMENTS

### 1.1 Effect of the proportion of Distillation

The proportion of distillation loss significantly impacts model performance during the knowledge distillation process. Properly calibrating this loss proportion is crucial for achieving the optimal balance between knowledge transfer and model training efficiency. In this experiment, we explored the impact of the distillation ratio on the performance of our model. As shown in Table 1, we observed When  $\lambda = 0.7$  tiny LLMs get low performance in vision-language tasks. High distillation loss weight may lead to overfitting on the large model’s specific behaviors, potentially ignoring the intrinsic learning capabilities of the tiny model. Due to their mutual influence, the large model ends up with suboptimal features, leading both models into a vicious cycle where their performance simultaneously deteriorates. When  $\lambda = 0.1$ , tiny LLMs might not sufficiently capture the nuanced knowledge or expertise from the Large model, resulting in suboptimal performance. Through experimentation we use  $\lambda = 0.3$  during our training process.

## 2 DETAILED TRAINING SETTINGS

### 2.1 Settings of Stage I

As shown in Table 2, in this stage, the image encoder is initialized using CLIP-ViT-L/14 336, the tiny language model is initialized using OPT-125m, and the large language model is initialized using Vicuna-7B. All parameters except the image encoder and large language model are fully trainable. We employ the AdamW optimizer, weight decay at 0.1 and cosine learning rate schedule starting at  $1e-3$  for tiny language model. The training involves a total batch size of 256 across 8 A800 GPUs, extending over 300K iterations to process about 93 million samples. The input resolution is  $336 \times 336$ .

### 2.2 Settings of Stage II

In this stage, the Tiny language model inherits weights from the first stage. All parameters except the image encoder are fully trainable. The input images are processed at a resolution of  $336 \times 336$ .

For optimization, the AdamW optimizer is employed with weight decay seen at 0.05, and a total batch size of 64. The training extends over 40K steps across 8 A800 GPUs, inclusive of 2K warm-up steps. More detailed training settings are listed in Table 2.

## 3 DATA PREPARATION

To fully utilize web-scale image-text data, we adopted different data filtering strategies in stage 1 and stage 2. In Stage 1, we first applied only minor data filtering, thus retaining the vast majority of the data. We considered six factors: CLIP similarity, watermark probability, unsafe probability, aesthetic score, image resolution, and caption length, to remove extreme data points and avoid disrupting training stability. Then we deleted most of the low-quality data based on the captions, mainly considering the length, completeness, readability, and whether they were gibberish or boilerplate (like menus, error messages, or duplicate text), contained offensive

Table 1: Ablation study of the proportion of KL-divergence Distillation Loss, we compare both Tiny and Large models’ performance in vision-language tasks with different  $\lambda$

|           | $\lambda$ | VQAv2       | GQA         | Text VQA    |
|-----------|-----------|-------------|-------------|-------------|
| Tiny LMs  | 0.1       | 59.8        | 43.5        | 38.7        |
|           | 0.3       | <b>68.3</b> | <b>49.3</b> | <b>45.2</b> |
|           | 0.7       | 40.3        | 25.6        | 23.4        |
| Large LMs | 0.1       | 78.9        | 62.7        | 60.5        |
|           | 0.3       | <b>79.9</b> | <b>63.8</b> | <b>62.3</b> |
|           | 0.7       | 63.8        | 54.9        | 53.1        |

Table 2: Training setting of CTVLMs’ stage 1 and stage 2.

| config                             | Stage 1        | Stage 2        |
|------------------------------------|----------------|----------------|
| image enc. Weight init             | from clip      | from clip      |
| tiny text enc. Weight init         | from opt125m   | from stage 1   |
| large text enc. Weight init        | from vicuna 7B | from stage 1   |
| image enc. Peak learning rate      | -              | -              |
| tiny text enc. Peak learning rate  | $1e-3$         | $1e-4$         |
| large text enc. Peak learning rate | frozen         | $1e-5$         |
| cross attn peak learning rate      | $5e-5$         | -              |
| learning rate schedule             | cosine decay   | cosine decay   |
| optimizer                          | AdamW          | AdamW          |
| weight decay                       | 0.1            | 0.05           |
| input resolution                   | 336            | 336            |
| patch size                         | 32             | 8              |
| total batch size                   | 256            | 64             |
| warm-up iterations                 | 5000           | 2000           |
| samples seen                       | 93M            | 1.5M           |
| drop path rate                     | 0              | 0              |
| $\lambda$                          | 0.3            | 0.3            |
| numerical precision                | DeepSpeed bf16 | DeepSpeed bf16 |
| trainable parameters               | 150M           | 7.1B           |
| GPU for training                   | 8×A800(80G)    | 8×A800(80G)    |

language, placeholder text, or source code. We retained only 93 million entries.

In stage 2, we adopted a data augmentation method that deconstructs multi-turn conversations into several single-turn dialogues in LLaVA-mix-665k dataset. For instance, as shown in Figure??, we prepend a special image token to the question for the purely textual conversations without image inputs, allowing the model to input image features during training. This method not only maintains the multimodal nature of the training data but also ensures that the model remains adept at handling visual contexts alongside textual information. By training the model in this enriched environment, we aim to improve its ability to understand and generate responses that are contextually aligned with both text and imagery, thereby enhancing its overall multimodal processing capabilities.

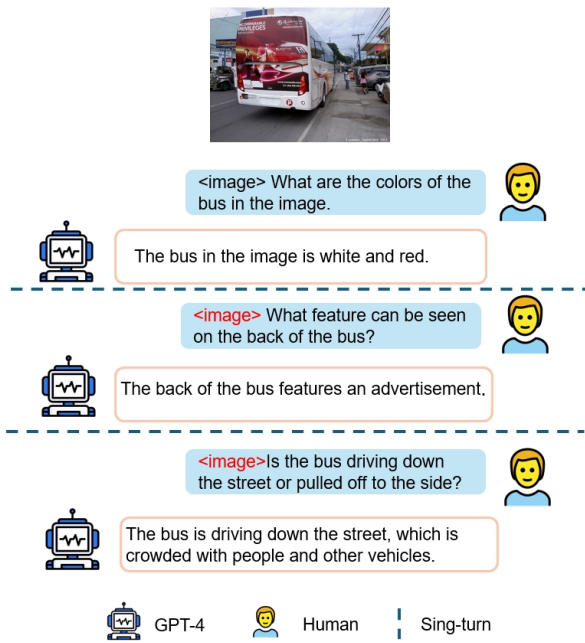

**Figure 1: Sample for our data augmentation method. We have deconstructed the multi-turn dialogue in the figure into three separate single-turn dialogues, and for each question, we have inserted an image token.**

## 4 VISUALIZATION

In this section, we visualized an example to demonstrate the conversational capabilities of our model. As shown in figure2, our model can understand images and the text contained within them, and it can provide corresponding descriptions or reasoning.

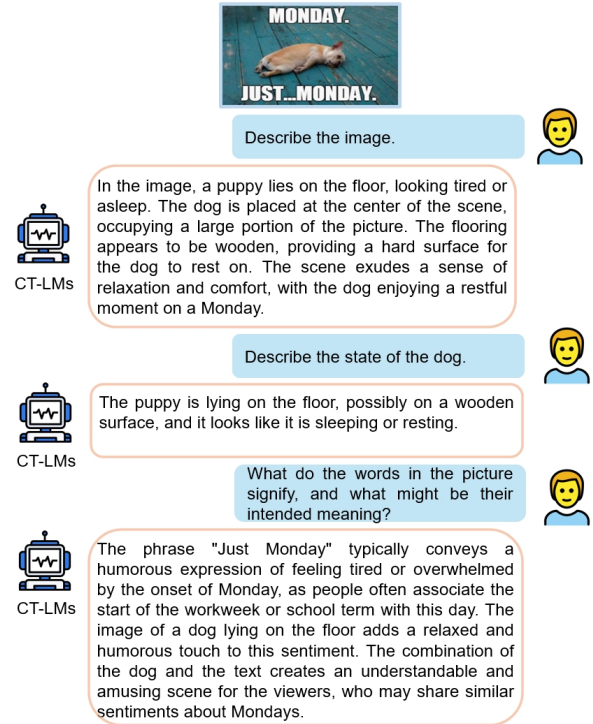

**Figure 2: An example showcasing the capabilities of our CTLMs in image-text dialogues.**
